# Supplementary material for: Association between dietary index for gut microbiota and obstructive sleep apnea: the mediating role of obesity indicators and inflammatory markers
Source: Research Square preprint supplement (doi:10.21203/rs.3.rs-6974882/v1), 2025-08-11
Supplement: Supplementary file 1 [file 151292acc849babd50963b20.docx]

**Supplementary Table 1.** Components and scoring criteria of DI-GM in NHANES.

| **Components of DI-GM** | **Food items included in NHANES** | **Scoring criteria** |
| --- | --- | --- |
| **Beneficial to gut microbiota** | Avocados | Score 1 - Consumption≥sex-specific median  Score 0 - Otherwise Green tea |
| Broccoli |
| Chickpeas |
| Coffee |
| Cranberries |
| Fermented dairy (including yogurt, cheese, kefir, sour cream, buttermilk) |
| Fiber |
| Green tea |
| Soybean (including Soy milk, Tofu) |
| Whole grains |
| **Unfavorable to gut microbiota** | Refined grains | Score 0 - Consumption≥sex-specific median  Score 1 - Otherwise |
| Processed meat |
| Red meat |
| High-fat diet (% energy) | Score 0 - Consumption≥40%  Score 1 - Otherwise |

Abbreviations: DI-GM, dietary index for gut microbiota; NHANES, National Health and Nutrition Examination Survey.

**Supplementary Table 2.** The detail definition and classification of covariates.

| **Variables** | **Definitions or Classification** |
| --- | --- |
| Sex | Male, Female. |
| Race | Non-Hispanic White, Non-Hispanic Black, Mexican American, Other Race. |
| Education level | High school or less, More than high school. |
| Marital status | Married or living with partner, Living alone. |
| PIR | Low (PIR ≤1), Middle (1< PIR < 4), and High (PIR ≥4). |
| Smoking status | Never smoking: <100 cigarettes in lifetime;  Former smoking: >100 cigarettes in life and smoke not at all now;  Now smoking: >100 cigarettes in lifetime. |
| Drinking status | Never: consumed fewer than 12 drinks in their lifetime;  Former: consumed at least 12 drinks in one year but did not drink in the last year or did not drink in the last year but had at least 12 drinks in their lifetime;  Heavy: consumed at least 3 drinks per day for females, at least 4 drinks per day for males, or engaged in binge drinking on 5 or more days per month;  Moderate: consumed at least 2 drinks per day for females, at least 3 drinks per day for males, or engaged in binge drinking on at least 2 days per month;  Mild : consumed at most 1 drink per day for females, at most 2 drinks per day for males. |
| Hypertension | An average systolic blood pressure (SBP) equal to or exceeding 140 mmHg;  An average diastolic blood pressure (DBP) equal to or exceeding 90 mmHg;  Self-reported hypertension;  Individuals taking prescribed anti-hypertensive medications. |
| DM | i) physician confirmation of diabetes diagnosis, ii) glycohemoglobin levels equal to or greater than 6.5%, iii) fasting glucose ≥ 7.0 mmol/L, iv) random blood glucose≥ 11.1 mmol/L, and v) documented use of DM medication. |
| CVD | The medical conditions section, identified by the variable name prefix MCQ, encompasses self- and proxy-reported personal interview data covering an extensive range of health conditions and medical history for both children and adults. This section includes inquiries such as ‘Has a doctor or other health professional ever informed you/SP that you/he/she… had congestive heart failure, coronary heart disease, angina (also called angina pectoris), heart attack (also called myocardial infarction), stroke, etc.?’ These questions, labeled as MCQ160B-F in the household questionnaires administered during home interviews, were utilized to identify participants with a history of CVD if they responded ‘yes’ to any of these questions. |
| Energy intake | The intake of energy was determined by means of two days of dietary interviews. |

Abbreviations: PIR, family poverty income ratio; DM, diabetes mellitus; CVD, cardiovascular disease.

**Supplementary Table 3.** Stratified analysis of the associations DI-GM and OSA.

|  | **OR (95%CI)** | **P value** | **P for interaction** |
| --- | --- | --- | --- |
| **Age** |  |  | 0.450 |
| <60 | 0.93 (0.87,1.00) | 0.040 |  |
| ≥60 | 0.94 (0.87,1.02) | 0.143 |  |
| **Sex** |  |  | 0.058 |
| Male | 0.97 (0.91,1.03) | 0.255 |  |
| Female | 0.91 (0.85,0.98) | 0.011 |  |
| **PIR** |  |  | 0.375 |
| Low | 0.90 (0.81,1.01) | 0.065 |  |
| Middle | 0.96 (0.91,1.03) | 0.247 |  |
| High | 0.93 (0.85,1.01) | 0.067 |  |
| **Smoking status** |  |  | 0.680 |
| Never | 0.95 (0.90,1.01) | 0.098 |  |
| Former | 0.92 (0.83,1.01) | 0.075 |  |
| Now | 0.92 (0.85,0.99) | 0.033 |  |
| **Hypertension** |  |  | 0.024 |
| No | 0.90 (0.85,0.96) | 0.003 |  |
| Yes | 0.99 (0.92,1.05) | 0.686 |  |
| **DM** |  |  | 0.357 |
| No | 0.93 (0.89,0.98) | 0.009 |  |
| Yes | 0.97 (0.87,1.08) | 0.545 |  |
| **CVD** |  |  | 0.291 |
| No | 0.93 (0.89,0.98) | 0.005 |  |
| Yes | 0.97 (0.87,1.09) | 0.581 |  |

Notes: Adjusted for age, sex, race, education level, marital status, PIR, smoking status, drinking status, energy intake, CVD, DM, and hypertension.

Abbreviations: DI-GM, dietary index of gut microbiota; PIR, poverty income ratio; OSA, obstructive sleep apnea; DM, diabetes mellitus; CVD, cardiovascular disease; CI, confidence interval; OR, odds ratios.

**Supplementary Table 4.** The mediating role of BMI, BRI, NEUT, and RDW in the association between DI-GM and OSA.

| **Mediator** | **Total effect** | | **Direct effect** | | **Indirect effect** | | **Proportion Mediated (%)** |
| --- | --- | --- | --- | --- | --- | --- | --- |
| **Coefficients (95% CI)** | **P value** | **Coefficients (95% CI)** | **P value** | **Coefficients (95% CI)** | **P value** |
| BMI | -1.15e-02  (-1.81e-02, -5.81e-03) | <0.001 | -8.18e-03 (-1.43e-02, -2.54e-03) | 0.002 | -3.33e-03 (-4.52e-03, -2.22e-03) | <0.001 | 28.94% |
| BRI | -1.15e-02 (-1.73e-02, -5.58e-03) | 0.002 | -7.62e-03 (-1.35e-02, -1.87e-03) | 0.014 | -3.92e-03 (-5.15e-03, -2.80e-03) | <0.001 | 33.98% |
| NEUT | -1.18e-02 (-1.79e-02, -6.26e-03) | <0.001 | -1.13e-02 (-1.74e-02, -5.88e-03) | <0.001 | -5.15e-04 (-8.79e-04, -1.98e-04) | <0.001 | 4.37% |
| RDW | -1.18e-02 (-1.83e-02, -6.23e-03) | <0.001 | -1.12e-02 (-1.76e-02, -5.56e-03) | <0.001 | -6.28e-04 (-1.05e-03, -3.06e-04) | <0.001 | 5.31% |

Notes: Adjusted for age, sex, race, education level, marital status, PIR, smoking status, drinking status, energy intake, CVD, DM, and hypertension.

Abbreviations: DI-GM, dietary index of gut microbiota; PIR, poverty income ratio; OSA, obstructive sleep apnea; DM, diabetes mellitus; CVD, cardiovascular disease; BMI, body mass index; BRI, body roundness index; RDW, red blood cell distribution width; CI, confidence interval.
